# Supplementary material for: Spraying distance and titanium chloride surface treatment effects on DSSC performance of electrosprayed SnO2photoanodes
Source: Royal Society of Chemistry journal article supplement (doi:10.1039/c4ra02679a), 2014-07-28
Supplement: c4ra02679a1.pdf [file c4ra02679a1.pdf]

## Spraying distance and titanium chloride surface treatment effects on DSSCs performance of electro sprayed SnO<sub>2</sub> photoanodes

Shoyebmohamad F. Shaikh,<sup>a,b</sup> Rajaram S. Mane,<sup>a</sup> Oh-Shim Joo<sup>a,\*</sup>

<sup>a</sup> Clean Energy Research Center, Korea Institute of Science and Technology, Seoul 130-650, Republic of Korea

<sup>b</sup> Korea University of Science and Technology, 52 Eoeun dong, Yuseong-gu, Daejeon 305-333, Republic of Korea.

### Electronic Supplementary Information-

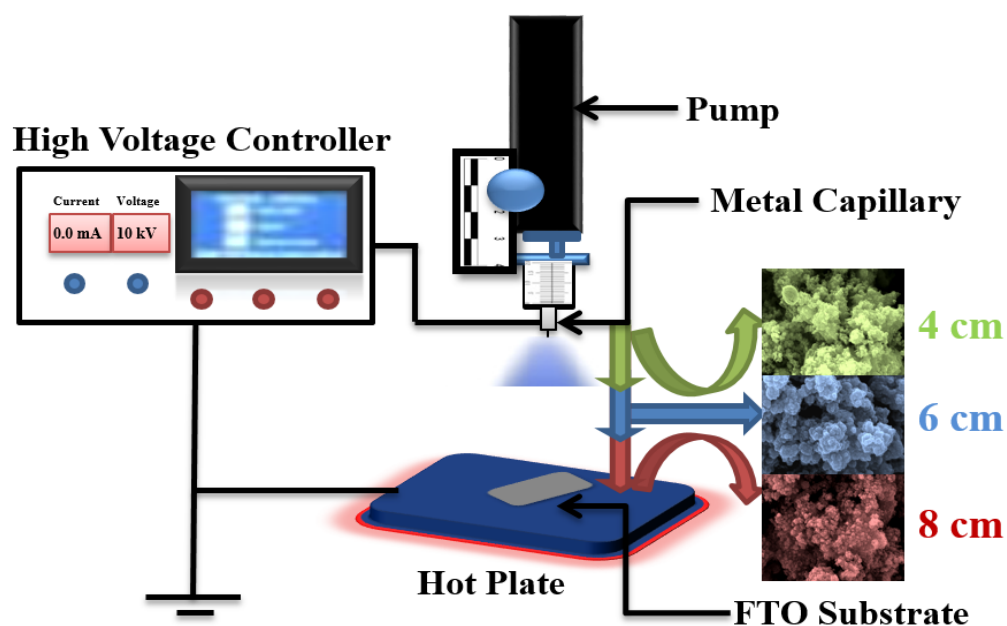

**Fig S1** and effect of distance between metal capillary and FTO substrate on SnO<sub>2</sub> photoanode morphology.

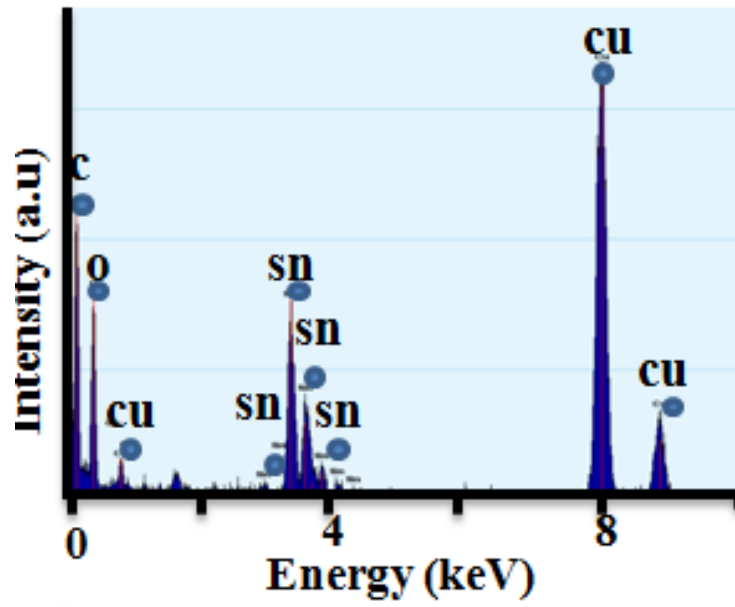

Fig S2: EDX mapping of SnO<sub>2</sub> photoanode obtained at 8 cm.

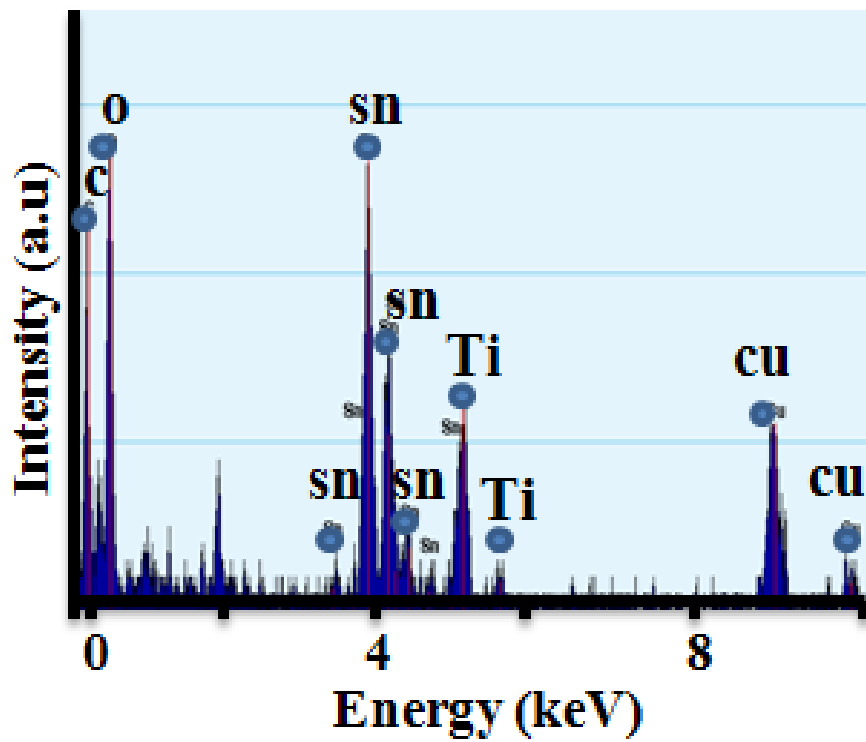

Fig S3: EDX mapping of SnO<sub>2</sub>-TiO<sub>2</sub> photoanode
